# Supplementary material
Source: PubMed Central journal article supplement (PMC4136589)
Supplement: 1403052111_pnas.201403052SI.pdf [file 1403052111_pnas.201403052SI.pdf]

# Supporting Information

Hayes et al. 10.1073/pnas.1403052111

## SI Materials and Methods

**Yeast 2-Hybrid Assays.** Yeast two-hybrid (Y2H) assays were performed using the AH109 yeast strain and pGBKT7 (encoding the Gal4-BD) and pGADT7 (encoding Gal4-AD) plasmids (Clontech). Positive control plasmids encoded the Gal4 DNA-BD fused with murine p53 (+BD) and the Gal4-AD fused with SV40 large T-antigen (+AD) (Clontech). UVR8-Gal4-BD and COP1-Gal4-AD fusions have been described previously (1, 2). For the COP1-Gal4-BD fusion, the full-length coding sequence of *COP1* was amplified from WT Col-0 cDNA using the COP1F and COP1R primers (Table S1). The resulting PCR product was cloned into the EcoRI, Sall sites of the MCS of pGBKT7. For the PIF3-Gal4-BD fusion, the full-length coding sequence of *PIF3* was amplified from cDNA of heat-treated (6 h, 37 °C) Col-0 plants using the PIF3F and PIF3R primers (Table S1). The resulting PCR product was cloned into the EcoRI, Sall sites of the MCS of pGBKT7. For the fusions of *PIF4*, *PIF5*, and *PIF7* with Gal4-AD, partial-length coding sequences of *PIF4* (lacking the first two amino acids) and *PIF5* (lacking the first 10 amino acids), and the full-length coding sequence of *PIF7* were amplified from cDNA of heat-treated (6 h, 37 °C) Col-0 plants. The

primer pairs were PIF4F + PIF4R, PIF5F + PIF5R, and PIF7F + PIF7R (Table S1). The resulting PCR products were cloned into the NdeI, ClaI sites (*PIF4*) and the EcoRI, BamHI sites (*PIF5* and *PIF7*) of the MCS of pGADT7. All constructs were verified by sequencing.

The preparation and transformation of yeast-competent cells was carried out as described previously (3) with the following exceptions: between five and seven colonies of transformed yeast were pooled together for spotting onto the selective media, all washing steps were repeated twice, and the final resuspension of cells before spotting was done in 1× TE instead of in 0.8% NaCl. Cells were spotted on plates containing SD medium (63041; Clontech) with minus leucine (L), minus tryptophan (W), minus histidine (H), and minus adenine (A) dropout supplements. Nonselective SD-L-W plates served as a viability control. Low-stringency SD-L-W-H plates were used to detect weak interactions, and high-stringency SD-L-W-H-A plates were used for detection of stronger interactions. Plates were left for 3 d at 30 °C in darkness or 0.1  $\mu\text{mol m}^{-2}\text{s}^{-1}$  UV-B (supplied by a Philips TL20W/01RS tube). Photographs were taken after 48 h for SD-L-W, after 72 h for SD-L-W-H, and after 96 h for SD-L-W-H-A.

1. Cloix C, et al. (2012) C-terminal region of the UV-B photoreceptor UVR8 initiates signaling through interaction with the COP1 protein. *Proc Natl Acad Sci USA* 109(40): 16366–16370.
2. Holm M, Hardtke CS, Gaudet R, Deng XW (2001) Identification of a structural motif that confers specific interaction with the WD40 repeat domain of *Arabidopsis* COP1. *EMBO J* 20(1-2):118–127.

3. O'Hara A, Jenkin GI (2012) In vivo function of tryptophans in the *Arabidopsis* UV-B photoreceptor UVR8. *Plant Cell* 24:3755–3766.

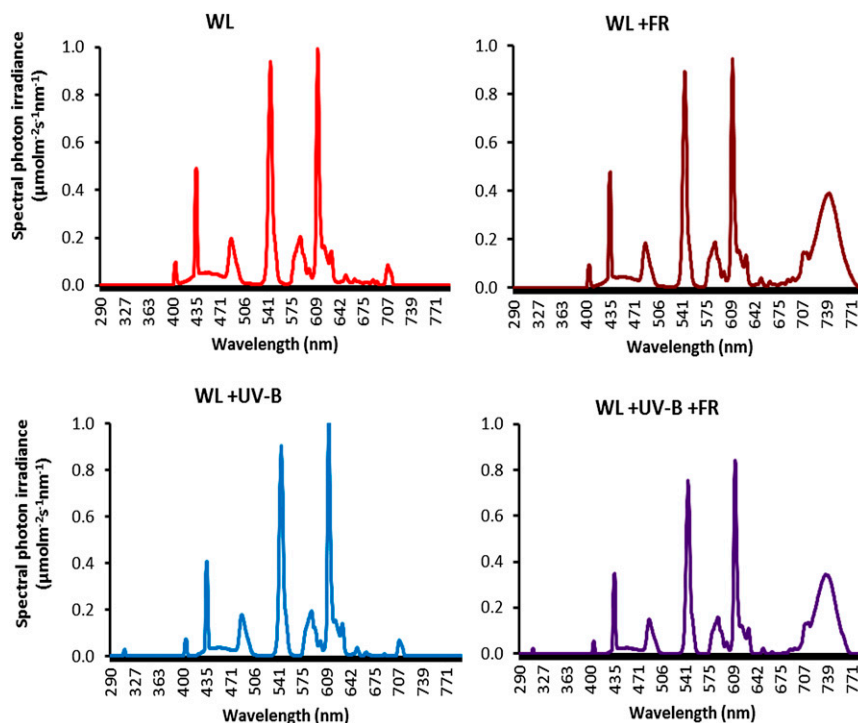

**Fig. S1.** Spectra of experimental conditions used for low R:FR shade avoidance experiments. 90  $\mu\text{mol m}^{-2}\text{s}^{-1}$  white light (WL) was supplemented with FR to reduce the R:FR to 0.05. Supplementary UV-B was given at 400  $\text{mWm}^{-2}$  ( $\sim 1 \mu\text{mol m}^{-2}\text{s}^{-1}$ ).



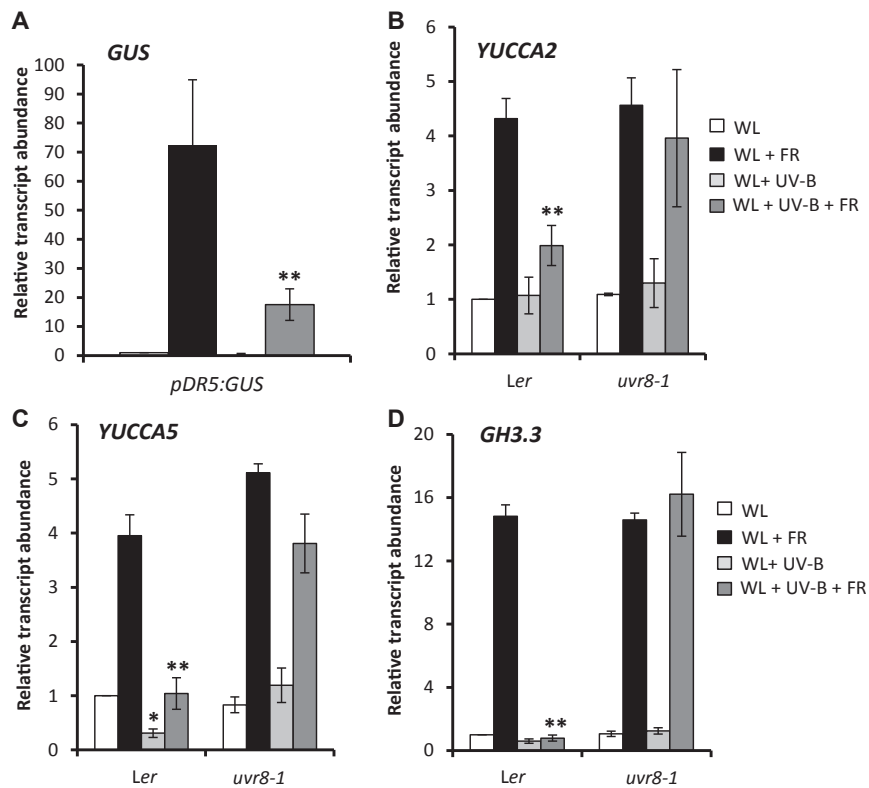

**Fig. S4.** UV-B inhibits auxin activity. (A) *GUS* transcript abundance in *pDR5:GUS* seedlings grown for 7 d in continuous WL before transfer to WL, +FR, +UV-B, and +FR+UV-B for 2 h.  $n = 3 \pm SE$ . \*Difference in transcript abundance compared with +FR ( $P = 0.055$ ). (B–D) Relative transcript abundance of *YUCCA2* (B), *YUCCA5* (C), and *GH3.3* (D) in 7-d-old WT (*Ler*) and *uvr8-1* seedlings transferred to experimental conditions for 4 h.  $n = 3 \pm SE$ . \*Significant difference in transcript abundance compared with WL ( $P < 0.05$ ). \*\*Significant difference in transcript abundance compared with +FR ( $P < 0.05$ ).

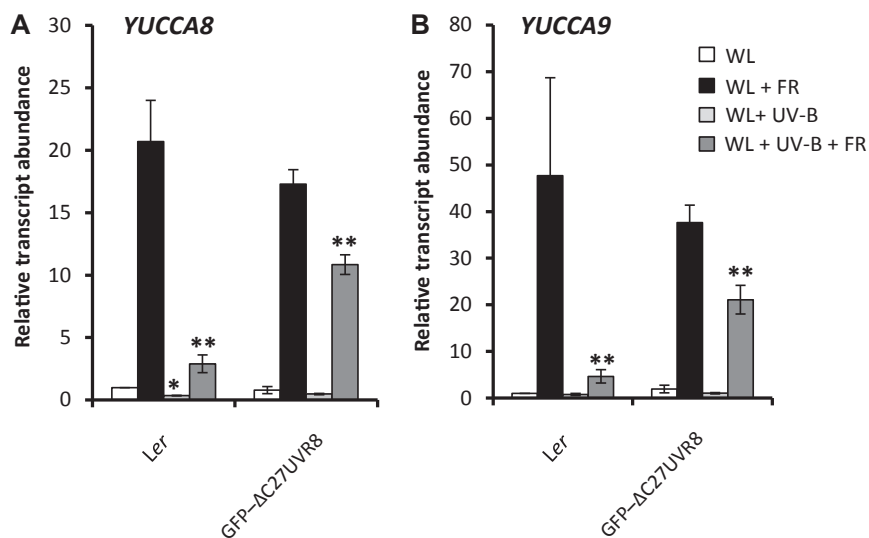

**Fig. S5.** UV-B-mediated inhibition of low R:FR-induced auxin biosynthesis genes occurs in *GFP-ΔC27UVR8* plants. Relative transcript abundance of *YUCCA8* (A) and *YUCCA9* (B) in 7-d-old WT (*Ler*) and *GFP-ΔC27UVR8* seedlings transferred to experimental conditions for 4 h.  $n = 3 \pm SE$ . \*Significant difference in transcript abundance compared with WL ( $P < 0.05$ ). \*\*Significant difference in transcript abundance compared with +FR ( $P < 0.05$ ).

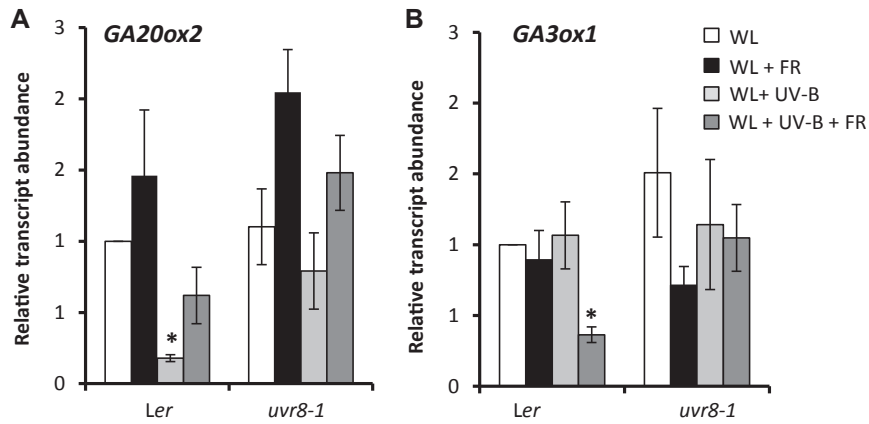

**Fig. 56.** GA biosynthesis genes do not display increased transcript abundance in UV-B. Relative transcript abundance of *GA20ox2* (A) and *GA3ox1* (B) in 7-d-old WT (Ler) and *uvr8-1* seedlings transferred to experimental conditions for 4 h.  $n = 3 \pm$  SE. \*Significant difference in transcript abundance compared with WL ( $P < 0.05$ ).

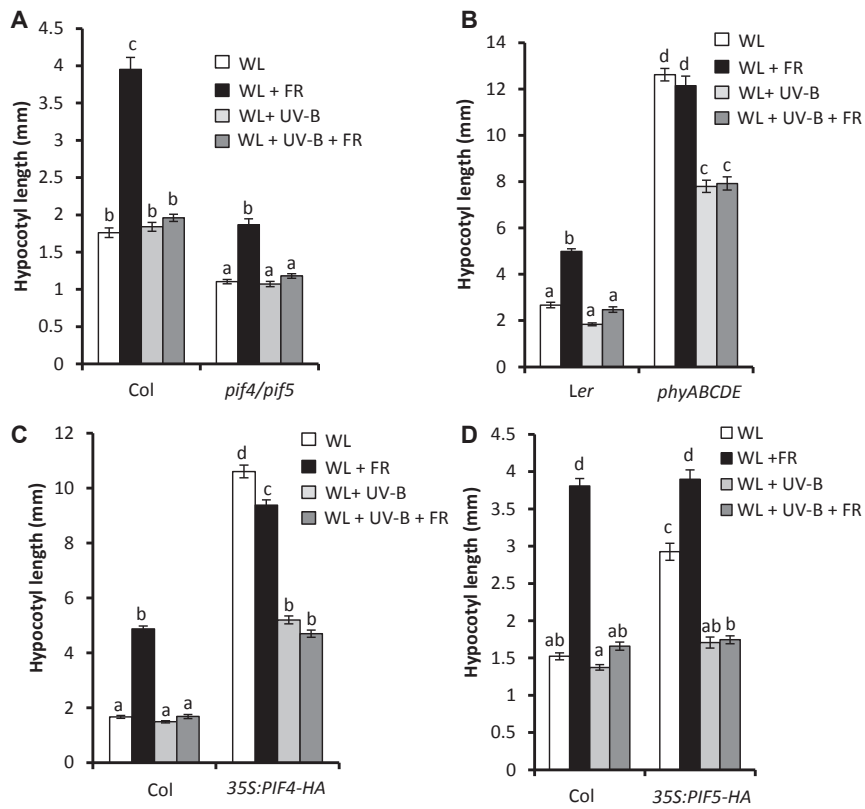

**Fig. 57.** UV-B-mediated inhibition of low R:FR-induced hypocotyl elongation occurs independent of phytochrome and involves PIF4 and PIF5. (A) Hypocotyl lengths of WT (Col-0) and *pif4/pif5* seedlings grown for 3 d in WL before transfer to WL, +FR, +UV-B, and +FR+UV-B for a further 4 d. (B) Hypocotyl lengths of WT (Ler) and *phyABCDE* seedlings grown as in A. (C and D) Hypocotyl lengths of WT (Col-0), PIF4ox (*35S:PIF4-HA*) (C), and PIF5ox (*35S:PIF5-HA*) (D) grown as in A.  $n \geq 34 \pm$  SE. Different letters indicate statistically significant differences between means ( $P < 0.05$ ).
